# Supplementary material for: Upper Palaeolithic genomes reveal deep roots of modern Eurasians
Source: Springer Nature journal article supplement (doi:10.1038/ncomms9912), 2015-11-16
Supplement: ncomms9912-s1.pdf [file ncomms9912-s1.pdf]

Upper Palaeolithic genomes reveal deep roots of modern Eurasians | Nature Communications


Skip to main content

Thank you for visiting nature.com. You are using a browser version with limited support for CSS. To obtain
the best experience, we recommend you use a more up to date browser (or turn off compatibility mode in
Internet Explorer). In the meantime, to ensure continued support, we are displaying the site without styles
and JavaScript.

Advertisement

- View all journals
- Search
- My Account

  Login

- Explore content
- About the journal
- Publish with us

- Sign up for alerts
- RSS feed


1. nature
2. nature communications
3. articles
4. article

Upper Palaeolithic genomes reveal deep roots of modern Eurasians

Download PDF

Download PDF

- Article
- Open access
- Published: 16 November 2015

# Upper Palaeolithic genomes reveal deep roots of modern Eurasians

- Eppie R. Jones1,
- Gloria Gonzalez-Fortes2,3,
- Sarah Connell4,
- Veronika Siska5,
- Anders Eriksson 
  ORCID: orcid.org/0000-0003-3436-37265,6,
- Rui Martiniano1,
- Russell L. McLaughlin1,
- Marcos Gallego Llorente5,
- Lara M. Cassidy1,
- Cristina Gamba1,4,7,
- Tengiz Meshveliani8,
- Ofer Bar-Yosef9,
- Werner Müller10,11,
- Anna Belfer-Cohen12,
- Zinovi Matskevich13,
- Nino Jakeli8,
- Thomas F. G. Higham14,
- Mathias Currat15,
- David Lordkipanidze8,
- Michael Hofreiter2,
- Andrea Manica 
  ORCID: orcid.org/0000-0003-1895-450X5na1,
- Ron Pinhasi1,4na1 &
- …
- Daniel G. Bradley1na1

Show authors

*Nature Communications*
**volume 6**, Article number: 8912 (2015)
Cite this article

- 115k Accesses
- 237 Citations
- 416 Altmetric
- Metrics details

### Subjects

- Palaeontology
- Population genetics

## Abstract

We extend the scope of European palaeogenomics by sequencing the genomes of Late Upper Palaeolithic (13,300 years old, 1.4-fold coverage) and Mesolithic (9,700 years old, 15.4-fold) males from western Georgia in the Caucasus and a Late Upper Palaeolithic (13,700 years old, 9.5-fold) male from Switzerland. While we detect Late Palaeolithic–Mesolithic genomic continuity in both regions, we find that Caucasus hunter-gatherers (CHG) belong to a distinct ancient clade that split from western hunter-gatherers ∼45 kya, shortly after the expansion of anatomically modern humans into Europe and from the ancestors of Neolithic farmers ∼25 kya, around the Last Glacial Maximum. CHG genomes significantly contributed to the Yamnaya steppe herders who migrated into Europe ∼3,000 BC, supporting a formative Caucasus influence on this important Early Bronze age culture. CHG left their imprint on modern populations from the Caucasus and also central and south Asia possibly marking the arrival of Indo-Aryan languages.


### Similar content being viewed by others

### Palaeogenomics of Upper Palaeolithic to Neolithic European hunter-gatherers

Article
Open access
01 March 2023

Cosimo Posth, He Yu, … Johannes Krause

### Genome of a middle Holocene hunter-gatherer from Wallacea

Article
Open access
25 August 2021

Selina Carlhoff, Akin Duli, … Adam Brumm

### Initial Upper Palaeolithic humans in Europe had recent Neanderthal ancestry

Article
Open access
07 April 2021

Mateja Hajdinjak, Fabrizio Mafessoni, … Svante Pääbo

## Introduction

Ancient genomes from Eurasia have revealed three ancestral populations that contributed to contemporary Europeans in varying degrees1. Mesolithic individuals, sampled from Spain all the way to Hungary1,2,3, belong to a relatively homogenous group, termed western hunter-gatherers (WHG). The expansion of early farmers (EF) out of the Levant during the Neolithic transition led to major changes in the European gene pool, with almost complete replacement in the south and increased mixing with local WHG further north1,2,3,4,5. Finally, a later wave originating with the Early Bronze Age Yamnaya from the Pontic steppe, carrying partial ancestry from ancient North Eurasians (ANE) and ancestry from a second, undetermined source, arrived from the east, profoundly changing populations and leaving a cline of admixture in Eastern and Central Europe1,3,6. This view, which was initially based on a handful of genomes, was recently confirmed by extensive surveys of Eurasian samples from the Holocene5,7.

Here, we extend our view of the genetic makeup of early Europeans by both looking further back in time and sampling from the crossroads between the European and Asian continents. We sequenced a Late Upper Palaeolithic (‘Satsurblia’ from Satsurblia cave, 1.4-fold coverage) and a Mesolithic genome (‘Kotias’ from Kotias Klde cave, 15.4-fold) from Western Georgia, at the very eastern boundary of Europe. We term these two individuals Caucasus hunter-gatherers (CHG). To extend our overview of WHG to a time depth similar to the one available for our samples from the Caucasus, we also sequenced a western European Late Upper Palaeolithic genome, ‘Bichon’ (9.5-fold) from Grotte du Bichon, Switzerland. These new genomes, together with already published data, provide us with a much-improved geographic and temporal coverage of genetic diversity across Europe after the Last Glacial Maximum (LGM)8. We show that CHG belong to a new, distinct ancient clade that split from WHG ∼45 kya and from Neolithic farmer ancestors ∼25 kya. This clade represents the previously undetermined source of ancestry to the Yamnaya, and contributed directly to modern populations from the Caucasus all the way to Central Asia.

## Results

### Samples, sequencing and authenticity

Recent excavations of Satsurblia cave in Western Georgia yielded a human right temporal bone, dated to the Late Upper Palaeolithic 13,132–13,380 cal. BP. Following the approach of Gamba *et al.*3, extractions from the dense part of the petrous bone yielded sequencing libraries comprising 13.8% alignable human sequence which were used to generate 1.4-fold genome coverage. A molar tooth sampled from a later Mesolithic (9,529–9,895 cal. BP) burial in Kotias Klde, a rockshelter also in Western Georgia showed excellent preservation, with endogenous human DNA content of 76.9%. This was sequenced to 15.4-fold genome coverage. Grotte du Bichon is a cave situated in the Swiss Jura Mountains where a skeleton of a young male of Cro-magnon type was found and dated to the late Upper Palaeolithic 13,560–13,770 cal. BP (for further details on the archaeological context see Supplementary Note 1). A petrous bone sample extraction from this also gave excellent endogenous content at 71.5% and was sequenced to 9.5-fold coverage. The sequence data from each genome showed sequence length and nucleotide misincorporation patterns which were indicative of post-mortem damage and contamination estimates, based on X chromosome and mitochondrial DNA tests (Supplementary Note 2), were <1%, comparable to those found in other ancient genomes2,3,8.

### Continuity across the Palaeolithic–Mesolithic boundary

Kotias and Satsurblia, the two CHG, are genetically different from all other early Holocene (that is, Mesolithic and Neolithic) ancient genomes1,2,3,4,5,6,8,9,10, while Bichon is similar to other younger WHG. The distinctness of CHG can be clearly seen on a principal component analysis (PCA) plot11 loaded on contemporary Eurasian populations1, where they fall between modern Caucasian and South Central Asian populations in a region of the graph separated from both other hunter gatherer and EF samples (Fig. 1a). Clustering using ADMIXTURE software12 confirms this view, with CHG forming their own homogenous cluster (Fig. 1b). The close genetic proximity between Satsurblia and Kotias is also formally supported by *D*-statistics13, indicating the two CHG genomes form a clade to the exclusion of other pre-Bronze Age ancient genomes (Supplementary Table 2; Supplementary Note 3), suggesting continuity across the Late Upper Palaeolithic and Mesolithic periods. This result is mirrored in western Europe as Bichon is close to other WHG in PCA space (Fig. 1a) and outgroup *f*3 analysis (Supplementary Fig. 1), belongs to the same cluster as other WHG in ADMIXTURE analysis (Fig. 1b), and forms a clade with other WHG to the exclusion of other ancient genomes based on *D*-statistics (Supplementary Table 3; Supplementary Note 3). Thus, these new data indicate genomic persistence between the Late Upper Palaeolithic and Mesolithic both within western Europe and, separately, within the Caucasus.

**Figure 1: Genetic structure of ancient Europe.**

(**a**). Principal component analysis. Ancient data from Bichon, Kotias and Satsurblia genomes were projected11 onto the first two principal components defined by selected Eurasians from the Human Origins data set1. The percentage of variance explained by each component accompanies the titles of the axes. For context we included data from published Eurasian ancient genomes sampled from the Late Pleistocene and Holocene where at least 200 000 SNPs were called1,2,3,4,5,6,7,9 (Supplementary Table 1). Among ancients, the early farmer and western hunter-gatherer (including Bichon) clusters are clearly identifiable, and the influence of ancient north Eurasians is discernible in the separation of eastern hunter-gatherers and the Upper Palaeolithic Siberian sample MA1. The two Caucasus hunter-gatherers occupy a distinct region of the plot suggesting a Eurasian lineage distinct from previously described ancestral components. The Yamnaya are located in an intermediate position between CHG and EHG. (**b**). ADMIXTURE ancestry components12 for ancient genomes (*K*=17) showing a CHG component (Kotias, Satsurblia) which also segregates in in the Yamnaya and later European populations.

Full size image

### Deep coalescence of early Holocene lineages

The geographical proximity of the Southern Caucasus to the Levant begs the question of whether CHG might be related to early Neolithic farmers with Near Eastern heritage. To address this question formally we reconstructed the relationship among WHG, CHG and EF using available high-quality ancient genomes1,3. We used outgroup *f*3-statistics14 to compare the three possible topologies, with the correct relationship being characterized by the largest amount of shared drift between the two groups that form a clade with respect to the outgroup (Fig. 2a; Supplementary Note 4). A scenario in which the population ancestral to both CHG and EF split from WHG receives the highest support, implying that CHG and EF form a clade with respect to WHG. We can reject a scenario in which CHG and WHG form a distinct clade with respect to EF. The known admixture of WHG with EF1,3,4,5 implies that some shared drift is found between WHG and EF with respect to CHG, but this is much smaller than the shared drift between CHG and EF. Thus, WHG split first, with CHG and EF separating only at a later stage.

**Figure 2: The relationship between Caucasus hunter-gatherers (CHG), western hunter-gatherers and early farmers.**

(**a**). Alternative phylogenies relating western hunter-gatherers (WHG), CHG and early farmers (EF, highlighted in orange), with the appropriate outgroup *f*3-statistics. (**b**). The best supported relationship among CHG (Kotias), WHG (Bichon, Loschbour), and EF (Stuttgart), with split times estimates using G-Phocs15. Oxygen 18 values (per mile) from the NGRIP core provide the climatic context; the grey box shows the extent of the Last Glacial Maximum (LGM).

Full size image

We next dated the splits among WHG, CHG and EF using a coalescent model implemented with G-PhoCS15 based on the high-coverage genomes in our data set (Fig. 2b for a model using the German farmer Stuttgart1 to represent EF; and Supplementary Table 5 for models using the Hungarian farmer NE1 (ref. 3)) and taking advantage of the mutation rate recently derived from Ust’-Ishim10. G-Phocs dates the split between WHG and the population ancestral to CHG and EF at ∼40–50 kya (range of best estimates depending on which genomes are used; see Supplementary Table 5 and Supplementary Note 5 for details), implying that they diverged early on during the colonisation of Europe16, and well before the LGM. On the WHG branch, the split between Bichon and Loschbour1 is dated to ∼16–18 kya (just older than the age of Bichon), implying continuity in western Europe, which supports the conclusions from our previous analyses. The split between CHG and EF is dated at ∼20–30 kya emerging from a common basal Eurasian lineage1 (Supplementary Fig. 2) and suggesting a possible link with the LGM, although the broad confidence intervals require some caution with this interpretation. In any case, the sharp genomic distinctions between these post-LGM populations contrasts with the comparative lack of differentiation between the earlier Eurasian genomes, for example, as visualized in the ADMIXTURE analysis (Fig. 1a), and it seems likely that this structure emerged as a result of ice age habitat restriction. Like EF, but in contrast to WHG, CHG carry a variant of the *SLC24A5* gene17 associated with light skin colour (rs1426654, see Supplementary Note 6). This trait, which is believed to have risen to high frequency during the Neolithic expansion18, may thus have a relatively long history in Eurasia, with its origin probably predating the LGM.

A partial genome from a 24,000-year-old individual (MA1) from Mal’ta, Siberia6 had been shown to be divergent from other ancient samples and was shown by Lazaridis *et al.*1, using *f**4* statistics, to have more shared alleles with nearly all modern Europeans than with an EF genome. This allowed inference of an ANE component in European ancestry, which was subsequently shown to have an influence in later eastern hunter-gatherers and to have spread into Europe via an incursion of Steppe herders beginning ∼4,500 years ago5,7. Several analyses indicate that CHG genomes are not a subset of this ANE lineage. First, MA1 and CHG plot in distinct regions of the PCA and also have very different profiles in the ADMIXTURE analysis (Fig. 1). Second, when we test if CHG shows any evidence of excess allele sharing with MA1 relative to WHG using tests of the form *D*(Yoruba, *CHG*; MA1, *WHG*) no combinations were significantly positive (Supplementary Table 6). Last, we also tested whether the ancestral component inferred in modern Europeans from MA1 was distinct from any that may have been donated from CHG using tests of the form *D*(Yoruba, MA1; CHG, modern North European population) (Supplementary Table 7). All northern Europeans showed a significant sharing of alleles with MA1 separate to any they shared with CHG.

WHG and CHG are the descendants of two ancient populations that appear to have persisted in Europe since the mid Upper Palaeolithic and survived the LGM separately. We looked at runs of homozygosity (ROH: Fig. 3) which inform on past population size3,19,20. Both WHG and CHG have a high frequency of ROH and in particular, the older CHG, Satsurblia, shows signs of recent consanguinity, with a high frequency of longer (>4 Mb) ROH. In contrast, EF are characterised by lower frequency of ROH of all sizes, suggesting a less constricted population history20,21, perhaps associated with a more benign passage through the LGM than the more northern populations (see Supplementary Note 7 for further details).

**Figure 3: Distribution of ROH.**

(**a**). The total length of short ROH (<1.6 Mb) plotted against the total length of long ROH (≥1.6 Mb) and (**b**) mean total ROH length for a range of length categories. ROH were calculated using a panel of 199,868 autosomal SNPs. For Kotias we analysed both high-coverage genotypes and genotypes imputed from downsampled data (marked in italics; see Supplementary Information). Diploid genotypes imputed from low-coverage variant calls were used for Satsurblia and high-coverage genotypes were used for all other samples. A clear distinction is visible between either WHG and CHG who display an excess of shorter ROH, akin to modern Oceanic and Onge populations, and EF who resemble other populations with sustained larger ancestral population sizes.

Full size image

### Caucasus hunter-gatherer contribution to subsequent populations

We next explored the extent to which Bichon and CHG contributed to contemporary populations using outgroup *f*3(African; modern, ancient) statistics, which measure the shared genetic history between an ancient genome and a modern population since they diverged from an African outgroup. Bichon, like younger WHG, shows strongest affinity to northern Europeans (Supplementary Fig. 3), while contemporary southern Caucasus populations are the closest to CHG (Fig. 4a and Supplementary Fig. 3), thus implying a degree of continuity in both regions stretching back at least 13,000 years to the late Upper Palaeolithic. Continuity in the Caucasus is also supported by the mitochondrial and Y chromosomal haplogroups of Kotias (H13c and J2a, respectively) and Satsurblia (K3 and J), which are all found at high frequencies in Georgia today22,23,24 (Supplementary Note 8).

**Figure 4: The relationship of Caucasus hunter-gatherers to modern populations.**

(**a**). Genomic affinity of modern populations1 to Kotias, quantified by the outgroup *f*3-statistics of the form *f*3(Kotias, modern population; Yoruba). Kotias shares the most genetic drift with populations from the Caucasus with high values also found for northern Europe and central Asia. (**b**). Sources of admixture into modern populations: semicircles indicate those that provide the most negative outgroup *f**3* statistic for that population. Populations for which a significantly negative statistic could not be determined are marked in white. Populations for which the ancient Caucasus genomes are best ancestral approximations include those of the Southern Caucasus and interestingly, South and Central Asia. Western Europe tends to be a mix of early farmers and western/eastern hunter-gatherers while Middle Eastern genomes are described as a mix of early farmers and Africans.

Full size image

EF share greater genetic affinity to populations from southern Europe than to those from northern Europe with an inverted pattern for WHG1,2,3,4,5. Surprisingly, we find that CHG influence is stronger in northern than Southern Europe (Fig. 4a and Supplementary Fig. 3A) despite the closer relationship between CHG and EF compared with WHG, suggesting an increase of CHG ancestry in Western Europeans subsequent to the early Neolithic period. We investigated this further using *D*-statistics of the form *D*(Yoruba, Kotias; EF, modern Western European population), which confirmed a significant introgression from CHG into modern northern European genomes after the early Neolithic period (Supplementary Fig. 4).

### CHG origins of migrating Early Bronze Age herders

We investigated the temporal stratigraphy of CHG influence by comparing these data to previously published ancient genomes. We find that CHG, or a population close to them, contributed to the genetic makeup of individuals from the Yamnaya culture, which have been implicated as vectors for the profound influx of Pontic steppe ancestry that spread westwards into Europe and east into central Asia with metallurgy, horseriding and probably Indo-European languages in the third millenium BC5,7. CHG ancestry in these groups is supported by ADMIXTURE analysis (Fig. 1b) and admixture *f*3-statistics14,25 (Fig. 5), which best describe the Yamnaya as a mix of CHG and Eastern European hunter-gatherers. The Yamnaya were semi-nomadic pastoralists, mainly dependent on stock-keeping but with some evidence for agriculture, including incorporation of a plow into one burial26. As such it is interesting that they lack an ancestral coefficient of the EF genome (Fig. 1b), which permeates through western European Neolithic and subsequent agricultural populations. During the Early Bronze Age, the Caucasus was in communication with the steppe, particularly via the Maikop culture27, which emerged in the first-half of the fourth millennium BC. The Maikop culture predated and, possibly with earlier southern influences, contributed to the formation of the adjacent Yamnaya culture that emerged further to the north and may be a candidate for the transmission of CHG ancestry. In the ADMIXTURE analysis of later ancient genomes (Fig. 1b) the Caucasus component gives a marker for the extension of Yamnaya admixture, with substantial contribution to both western and eastern Bronze Age samples. However, this is not completely coincident with metallurgy; Copper Age genomes from Northern Italy and Hungary show no contribution; neither does the earlier of two Hungarian Bronze Age individuals.

**Figure 5: Lowest admixture *f*3-statistics of the form *f*3 (*X*, *Y*; Yamnaya).**

These statistics represent the Yamnaya as a mix of two populations with a more negative result signifying the more likely admixture event. (**a**). All negative statistics found for the test *f*3(*X*, *Y*; Yamnaya) with the most negative result *f*3(CHG, EHG; Yamnaya) highlighted in purple. Lines bisecting the points show the standard error. (**b**). The most significantly negative statistics which are highlighted by the yellow box in **a**. Greatest support is found for Yamnaya being a mix of Caucasus hunter-gatherers (CHG) and Russian hunter-gatherers who belong to an eastern extension of the WHG clade (EHG).

Full size image

### Modern impact of CHG ancestry

In modern populations, the impact of CHG also stretches beyond Europe to the east. Central and South Asian populations received genetic influx from CHG (or a population close to them), as shown by a prominent CHG component in ADMIXTURE (Supplementary Fig. 5; Supplementary Note 9) and admixture *f*3-statistics, which show many samples as a mix of CHG and another South Asian population (Fig. 4b; Supplementary Table 9). It has been proposed that modern Indians are a mixture of two ancestral components, an Ancestral North Indian component related to modern West Eurasians and an Ancestral South Indian component related more distantly to the Onge25; here Kotias proves the majority best surrogate for the former28,29 (Supplementary Table 10). It is estimated that this admixture in the ancestors of Indian populations occurred relatively recently, 1,900–4,200 years BP, and is possibly linked with migrations introducing Indo-European languages and Vedic religion to the region28.

## Discussion

Given their geographic origin, it seems likely that CHG and EF are the descendants of early colonists from Africa who stopped south of the Caucasus, in an area stretching south to the Levant and possibly east towards Central and South Asia. WHG, on the other hand, are likely the descendants of a wave that expanded further into Europe. The separation of these populations is one that stretches back before the Holocene, as indicated by local continuity through the Late Palaeolithic/Mesolithic boundary and deep coalescence estimates, which date to around the LGM and earlier. Several analyses show that CHG are distinct from another inferred minor ancestral population, ANE, making them a divergent fourth strand of European ancestry that expands the model of the human colonization of that continent.

The separation between CHG and both EF and WHG ended during the Early Bronze Age when a major ancestral component linked to CHG was carried west by migrating herders from the Eurasian Steppe. The foundation group for this seismic change was the Yamnaya, who we estimate to owe half of their ancestry to CHG-linked sources. These sources may be linked to the Maikop culture, which predated the Yamnaya and was located further south, closer to the Southern Caucasus. Through the Yamanya, the CHG ancestral strand contributed to most modern European populations, especially in the northern part of the continent.

Finally, we found that CHG ancestry was also carried east to become a major contributor to the Ancestral North Indian component found in the Indian subcontinent. Exactly when the eastwards movement occurred is unknown, but it likely included migration around the same time as their contribution to the western European gene pool and may be linked with the spread of Indo-European languages. However, earlier movements associated with other developments such as that of cereal farming and herding are also plausible.

The discovery of CHG as a fourth ancestral component of the European gene pool underscores the importance of a dense geographical sampling of human palaeogenomes, especially among diverse geographical regions. Its separation from other European ancestral strands ended dramatically with the extensive population, linguistic and technological upheavals of the Early Bronze Age resulting in a wide impact of this ancestral strand on contemporary populations, stretching from the Atlantic to Central and South Asia.

## Methods

### Sample preparation and DNA sequencing

DNA was extracted from three samples; two from Georgia (Kotias and Satsurblia) and one from Switzerland (Bichon; Supplementary Fig. 6). Sample preparation, DNA extraction and library construction were carried out in dedicated ancient DNA facilities at Trinity College Dublin (Kotias and Satsurblia) and the University of York, England (Bichon). DNA was extracted from Kotias and Satsurblia following a silica column based protocol3 based on ref. 30 and libraries were prepared and amplified with AccuPrime Pfx Supermix (Life Technology), using a modified version of ref. 31 as outlined in ref. 3. For the ancient Swiss sample Bichon, DNA was extracted following32 and libraries were built as described above with the exception that enzymatic end-repair was arrested using heat inactivation rather than a silica-column purification step33,34. Libraries were first screened to assess their human DNA content on an Illumina MiSeq platform at TrinSeq, Dublin using 50 base pair (bp) single-end sequencing (Supplementary Table 11). Selected libraries were further sequenced on a HiSeq 2000 platform using 100 bp single-end sequencing (Supplementary Table 12).

### Sequence processing and alignment

To reduce the effects of post-indexing contamination, raw reads were retained if the Hamming distance for the observed index was within 1 base of the expected index. Adapter sequences were trimmed from the 3' ends of reads using cutadapt version 1.3 (ref. 35), requiring an overlap of 1 bp between the adapter and the read. As ancient DNA damage is more apparent at the ends of sequences36,37, the first and last two bp of all reads from the deep sequencing phase of analysis (Supplementary Table 12) were removed using SeqTK (https://github.com/lh3/seqtk). A minimum read length of 30 bp was imposed.

Sequences were aligned using Burrows-Wheeler Aligner (BWA) version 0.7 (ref. 38), with the seed region disabled, to the GRCh37 build of the human genome with the mitochondrial sequence replaced by the revised Cambridge reference sequence (NCBI accession number NC\_012920.1). Sequences from the same sample were merged using Picard MergeSamFiles (http://picard.sourceforge.net/) and duplicate reads were removed using SAMtools version 0.1.19 (ref. 39). Average depth of coverage was calculated using genome analysis toolkit (GATK) Depth of Coverage and indels were realigned using RealignerTargetCreator and IndelRealigner from the same suite of tools40. Reads with a mapping quality of at least 30 were retained using SAMtools39, and mapDamage 2.0 (ref. 41) was used with default parameters to downscale the quality scores of likely damaged bases, reducing the influence of nucleotide misincorporation on results. Only data from the deep sequencing phase of the project (100 bp single-end sequencing on a HiSeq 2,000) were used in the subsequent analyses.

### Authenticity of results

Rigorous measures were taken during laboratory work in an effort to minimize DNA contamination3 and negative controls were processed in parallel with samples. The authenticity of the data was further assessed *in silico* in a number of ways. The data were examined for the presence of short average sequence length and nucleotide misincorporation patterns which are characteristic of aDNA36,37 (Supplementary Figs 7 and 8). The degree of mitochondrial DNA contamination3,42 (Supplementary Table 13) and X chromosome contamination in male samples3 (Supplementary Tables 14-16) was also assessed (for further details see Supplementary Information).

### Molecular sex and uniparental haplogroups

Genetic sex was determined by examining the ratio of Y chromosome reads to reads aligning to both sex chromosomes43 (Supplementary Table 17). Mitochondrial haplogroups were assigned following4 with coverage determined using GATK Depth of Coverage40 (Supplementary Table 18). YFitter44, which employs a maximum likelihood based approach, was used to determine Y chromosome haplogroups for our ancient male samples (Supplementary Table 19).

### Merging ancient data with modern reference data set

Genotype calls from Kotias, Satsurblia, Bichon and selected Eurasian samples (Supplementary Table 1; Supplementary Note 10) were merged with modern genotype calls from the Human Origins data set1 using PLINK45. This data set was first filtered to exclude genotypes which had a minor allele frequency of zero in the modern populations, non-autosomal sites and modern populations with less than four individuals. Genotypes where neither allele was consistent with the GRCh37 orientation of the human genome were also removed.

For ancient samples with>8 × genome-wide coverage (namely Kotias, Bichon, Ust’-Ishim, Loschbour, Stuttgart, NE1 and BR2 (Supplementary Table 1)) genotypes were determined using GATK Unified Genotyper40. Genotypes were called at single-nucleotide polymorphism (SNP) positions observed in the Human Origins data set using sequencing data with a base quality≥30, depth≥8 and genotype quality≥20. The resulting VCF files were converted to PLINK format using VCFtools46.

For lower coverage samples genotypes were called at positions that overlapped with the Human Origins data set using GATK Pileup40. Bases were required to have a minimum quality of 30 and all triallelic SNPs were discarded. For SNP positions with more than one base call, one allele was randomly chosen with a probability equal to the frequency of the base at that position. This allele was duplicated to form a homozygous diploid genotype which was used to represent the individual at that SNP position47. This merged data set was used for PCA, ADMIXTURE, *f*3-statistics, *D*-statistics and ROH analysis.

### Population genetic analyses

PCA was performed by projecting selected ancient Eurasian data onto the first two principal components defined by a subset of the filtered Human Origins data set (Fig. 1a). This analysis was carried out using EIGENSOFT 5.0.1 smartpca11 with the lsqproject option on and the outlier removal option off. One SNP from each pair in linkage disequilibrium with *r*2>0.2 was removed47.

A clustering analysis was performed using ADMIXTURE version 1.23 (ref. 12). Genotypes were restricted to those that overlapped with the SNP capture panel described in ref. 5. Single-nucleotide polymorphisms in linkage disequilbrium were thinned using PLINK (v1.07)45 with parameters—indep-pairwise 200 25 0.5 (ref. 5) resulting in a set of 229,695 SNPs for analysis. Clusters (*K*) (2–20) were explored using 10 runs with fivefold cross-validation at each *K* with different random seeds (Supplementary Fig. 5). The minimal cross-validation error was found at *K*=17, but the error already starts plateauing from roughly *K*=10, implying little improvement from this point onwards. (Supplementary Fig. 9).

*D-*statistics13 and *f**3*-statistics14,25 were used to formally assess the relationships between samples. Statistics were computed using the qpDstat (*D*-statistics) and 3PopTest (*f**3*-statistics) programs from the ADMIXTOOLS package14. Significance was assessed using a block jackknife over 5 cM chunks of the genome14 and statistics were considered significant if their *Z*-score was of magnitude greater than 3 (ref. 25) corresponding approximately to a *P* value <0.001. For *f**3*-statistics where the test population was ancient the inbreed:YES option was used.

### Dating split times using G-PhoCS

A coalescent model implemented with G-PhoCS15 was used to date the split among WHG, CHG and EF. Both a tree with only ancient genomes and a tree with an African San Pygmy48 as the outgroup were considered (see Supplementary Information for further details).

### Runs of homozygosity

Examination of ROH requires dense diploid genotypes. Imputation was used to maximise the information content of our most ancient sample, Satsurblia, following the procedure described in ref. 3. Implementing a genotype probability threshold of 0.99 (Supplementary Fig. 10), imputed data for Satsurblia and downsampled-Kotias (see Supplementary Information) was merged with high confidence diploid calls for selected ancient samples (namely Bichon, Loschbour, NE1, Stuttgart and Kotias) as well as with SNP data from modern samples using PLINK45. This resulted in 199,868 overlapping high-quality diploid loci for ROH analysis which was carried out using PLINK45 as described in ref. 3.

### Phenotypes of interest

Genes which have been associated with particular phenotypes in modern populations were examined, including some loci which have been subject to selection in European populations (Supplementary Tables 20–23). We called genotypes in Bichon, Kotias and Satsurblia using GATK Unified Genotyper40. For each position under investigation we only called alleles which were present in the 1,000 Genomes data set49, using bases with a quality≥30 in positions with a depth≥4. Because of the low average coverage of Satsurblia (1.44 × ) we also used imputed genotypes for this sample (see above) imposing a genotype probability cut-off of 0.85 (ref. 3). We used the 8-plex50 and Hirisplex51 prediction models to predict hair, eye and skin colour for our samples. Other loci investigated are discussed in the Supplementary Information.

## Additional information

**Accession codes:** Alignment data are available through the European Nucleotide Archive (ENA) under the project accession number PRJEB11364. http://www.ebi.ac.uk/ena/data/view/PRJEB11364.

**How to cite this article:** Jones, E. R. *et al.* Upper palaeolithic genomes reveal deep roots of modern eurasians. *Nat. Commun.* 6:8912 doi: 10.1038/ncomms9912 (2015).

## Accession codes

### Accessions

#### European Nucleotide Archive

- PRJEB11364

## References

1. Lazaridis, I. et al. Ancient human genomes suggest three ancestral populations for present-day Europeans. *Nature* **513**, 409–413 (2014).

   Article 
   ADS 
   CAS 
   Google Scholar
2. Olalde, I. et al. Derived immune and ancestral pigmentation alleles in a 7,000-year-old Mesolithic European. *Nature* **507**, 225–228 (2014).

   Article 
   ADS 
   CAS 
   Google Scholar
3. Gamba, C. et al. Genome flux and stasis in a five millennium transect of European prehistory. *Nat. Commun* **5**, 5257 (2014).

   Article 
   CAS 
   Google Scholar
4. Skoglund, P. et al. Genomic diversity and admixture differs for stone-age Scandinavian foragers and farmers. *Science* **344**, 747–750 (2014).

   Article 
   ADS 
   CAS 
   Google Scholar
5. Haak, W. et al. Massive migration from the steppe was a source for Indo-European languages in Europe. *Nature* **522**, 207–211 (2015).

   Article 
   ADS 
   CAS 
   Google Scholar
6. Raghavan, M. et al. Upper Palaeolithic Siberian genome reveals dual ancestry of Native Americans. *Nature* **505**, 87–91 (2013).

   Article 
   ADS 
   CAS 
   Google Scholar
7. Allentoft, M. E. et al. Population genomics of Bronze Age Eurasia. *Nature* **522**, 167–172 (2015).

   Article 
   ADS 
   CAS 
   Google Scholar
8. Seguin-Orlando, A. et al. Paleogenomics. Genomic structure in Europeans dating back at least 36,200 years. *Science* **346**, 1113–1118 (2014).

   Article 
   ADS 
   CAS 
   Google Scholar
9. Keller, A. et al. New insights into the Tyrolean Iceman’s origin and phenotype as inferred by whole-genome sequencing. *Nat. Commun.* **3**, 698 (2012).

   Article 
   Google Scholar
10. Fu, Q. et al. Genome sequence of a 45,000-year-old modern human from western Siberia. *Nature* **514**, 445–449 (2014).

    Article 
    ADS 
    CAS 
    Google Scholar
11. Patterson, N., Price, A. L. & Reich, D. Population structure and eigenanalysis. *PLoS Genet.* **2**, e190 (2006).

    Article 
    Google Scholar
12. Alexander, D. H., Novembre, J. & Lange, K. Fast model-based estimation of ancestry in unrelated individuals. *Genome Res.* **19**, 1655–1664 (2009).

    Article 
    CAS 
    Google Scholar
13. Green, R. E. et al. ADraft Sequenceofthe Neandertal Genome. *Science* **328**, 710–722 (2010).

    Article 
    ADS 
    CAS 
    Google Scholar
14. Patterson, N. et al. Ancient admixture in human history. *Genetics* **192**, 1065–1093 (2012).

    Article 
    Google Scholar
15. Gronau, I., Hubisz, M. J., Gulko, B., Danko, C. G. & Siepel, A. Bayesian inference of ancient human demography from individual genome sequences. *Nat. Genet.* **43**, 1031–1034 (2011).

    Article 
    CAS 
    Google Scholar
16. Pinhasi, R., Thomas, M. G., Hofreiter, M., Currat, M. & Burger, J. The genetic history of Europeans. *Trends Genet.* **28**, 496–505 (2012).

    Article 
    CAS 
    Google Scholar
17. Lamason, R. L. et al. SLC24A5, a putative cation exchanger, affects pigmentation in zebrafish and humans. *Science* **310**, 1782–1786 (2005).

    Article 
    ADS 
    CAS 
    Google Scholar
18. Mathieson, I. et al. Eight thousand years of natural selection in Europe. Preprint at http://dx.doi.org/10.1101/016477 (2015).
19. Morin, E. Evidence for declines in human population densities during the early Upper Paleolithic in western Europe. *Proc. Natl. Acad. Sci. USA* **105**, 48–53 (2008).

    Article 
    ADS 
    CAS 
    Google Scholar
20. Kirin, M. et al. Genomic runs of homozygosity record population history and consanguinity. *PLoS ONE* **5**, e13996 (2010).

    Article 
    ADS 
    Google Scholar
21. Pemberton, T. J. et al. Genomic patterns of homozygosity in worldwide human populations. *Am. J. Hum. Genet.* **91**, 275–292 (2012).

    Article 
    CAS 
    Google Scholar
22. Semino, O. et al. Origin, diffusion, and differentiation of Y-chromosome haplogroups E and J: inferences on the neolithization of Europe and later migratory events in the Mediterranean area. *Am. J. Hum. Genet.* **74**, 1023–1034 (2004).

    Article 
    CAS 
    Google Scholar
23. Derenko, M. et al. Complete mitochondrial DNA diversity in Iranians. *PLoS ONE* **8**, e80673 (2013).

    Article 
    ADS 
    Google Scholar
24. Balanovsky, O. et al. Parallel evolution of genes and languages in the Caucasus region. *Mol. Biol. Evol.* **28**, 2905–2920 (2011).

    Article 
    CAS 
    Google Scholar
25. Reich, D., Thangaraj, K., Patterson, N., Price, A. L. & Singh, L. Reconstructing Indian population history. *Nature* **461**, 489–494 (2009).

    Article 
    ADS 
    CAS 
    Google Scholar
26. Mallory, J. P. *Yamna Culture*. (Encyclopedia of Indo-European Culture, 1997).
27. Kohl, P. L. *The Making of Bronze Age Eurasia* Cambridge University Press (2007).
28. Moorjani, P. et al. Genetic evidence for recent population mixture in India. *Am. J. Hum. Genet.* **93**, 422–438 (2013).

    Article 
    CAS 
    Google Scholar
29. Metspalu, M. et al. Shared and unique components of human population structure and genome-wide signals of positive selection in South Asia. *Am. J. Hum. Genet.* **89**, 731–744 (2011).

    Article 
    CAS 
    Google Scholar
30. Yang, D. Y., Eng, B., Waye, J. S., Dudar, J. C. & Saunders, S. R. Technical note: improved DNA extraction from ancient bones using silica-based spin columns. *Am. J. Phys. Anthropol.* **105**, 539–543 (1998).

    Article 
    CAS 
    Google Scholar
31. Meyer, M. & Kircher, M. Illumina sequencing library preparation for highly multiplexed target capture and sequencing. *Cold Spring Harb. Protoc.* **2010**, db.prot5448 (2010).

    Article 
    Google Scholar
32. Rohland, N., Siedel, H. & Hofreiter, M. A rapid column-based ancient DNA extraction method for increased sample throughput. *Mol. Ecol. Resour.* **10**, 677–683 (2010).

    Article 
    CAS 
    Google Scholar
33. Bollongino, R. et al. 2000 years of parallel societies in Stone Age Central Europe. *Science* **342**, 479–481 (2013).

    Article 
    ADS 
    CAS 
    Google Scholar
34. Fortes, G. G. & Paijmans, J. L. A. Analysis of whole mitogenomes from ancient samples. *Methods Mol. Biol.* **1347**, 179–195 (2015).

    Article 
    CAS 
    Google Scholar
35. Martin, M. Cutadapt removes adapter sequences from high-throughput sequencing reads. *EMBnet J.* **17**, 10–12 (2011).

    Article 
    Google Scholar
36. Briggs, A. W. et al. Patterns of damage in genomic DNA sequences from a Neandertal. *Proc. Natl Acad. Sci. USA* **104**, 14616–14621 (2007).

    Article 
    ADS 
    CAS 
    Google Scholar
37. Brotherton, P. et al. Novel high-resolution characterization of ancient DNA reveals C&gt;U-type base modification events as the sole cause of post mortem miscoding lesions. *Nucleic Acids Res.* **35**, 5717–5728 (2007).

    Article 
    CAS 
    Google Scholar
38. Li, H. & Durbin, R. Fast and accurate short read alignment with Burrows-Wheeler transform. *Bioinformatics* **25**, 1754–1760 (2009).

    Article 
    CAS 
    Google Scholar
39. Li, H. et al. The Sequence Alignment/Map format and SAMtools. *Bioinformatics* **25**, 2078–2079 (2009).

    Article 
    Google Scholar
40. McKenna, A. et al. The Genome Analysis Toolkit: a MapReduce framework for analyzing next-generation DNA sequencing data. *Genome Res.* **20**, 1297–1303 (2010).

    Article 
    CAS 
    Google Scholar
41. Jónsson, H., Ginolhac, A., Schubert, M., Johnson, P. L. F. & Orlando, L. mapDamage2.0: fast approximate Bayesian estimates of ancient DNA damage parameters. *Bioinformatics* **29**, 1682–1684 (2013).

    Article 
    Google Scholar
42. Sánchez-Quinto, F. et al. Genomic affinities of two 7,000-year-old Iberian hunter-gatherers. *Curr. Biol.* **22**, 1494–1499 (2012).

    Article 
    Google Scholar
43. Skoglund, P., Storå, J., Götherström, A. & Jakobsson, M. Accurate sex identification of ancient human remains using DNA shotgun sequencing. *J. Archaeol. Sci.* **40**, 4477–4482 (2013).

    Article 
    CAS 
    Google Scholar
44. Jostins, L. et al. YFitter: Maximum likelihood assignment of Y chromosome haplogroups from low-coverage sequence data. Preprint at http://arxiv.org/abs/1407.7988 (2014).
45. Purcell, S. et al. PLINK: a tool set for whole-genome association and population-based linkage analyses. *Am. J. Hum. Genet.* **81**, 559–575 (2007).

    Article 
    CAS 
    Google Scholar
46. Danecek, P. et al. The variant call format and VCFtools. *Bioinformatics* **27**, 2156–2158 (2011).

    Article 
    CAS 
    Google Scholar
47. Skoglund, P. et al. Origins and genetic legacy of Neolithic farmers and hunter-gatherers in Europe. *Science* **336**, 466–469 (2012).

    Article 
    ADS 
    CAS 
    Google Scholar
48. Prüfer, K. et al. The complete genome sequence of a Neanderthal from the Altai Mountains. *Nature* **505**, 43–49 (2013).

    Article 
    ADS 
    Google Scholar
49. 1000 Genomes Project Consortium. et al. An integrated map of genetic variation from 1,092 human genomes. *Nature* **491**, 56–65 (2012).
50. Hart, K. L. et al. Improved eye- and skin-color prediction based on 8 SNPs. *Croat. Med. J.* **54**, 248–256 (2013).

    Article 
    CAS 
    Google Scholar
51. Walsh, S. et al. The HIrisPlex system for simultaneous prediction of hair and eye colour from DNA. *Forensic Sci. Int. Genet.* **7**, 98–115 (2013).

    Article 
    CAS 
    Google Scholar

Download references

## Acknowledgements

This research was supported by the European Research Council (ERC) Starting Grant to R.P. (ERC-2010-StG 263441). D.B., M.H and AM. were also supported by the ERC (295729-CodeX, 310763-GeneFlow and 647787-LocalAdaptation respectively). The National Geographic Global Exploration Fund funded fieldwork in Satsurblia Cave l from April 2013 to February 2014 (grant- GEFNE78–13). V.S. was supported by a scholarship from the Gates Cambridge Trust and M.G.L. by a BBSRC DTP studentship. C.G. was supported by the Irish Research Council for Humanities and Social Sciences (IRCHSS) ERC Support Programme and the Marie-Curie Intra-European Fellowships (FP7-IEF-328024). R.M. was funded by the BEAN project of the Marie Curie ITN (289966) and L.C. by the Irish Research Council (GOIPG/2013/1219). R.L.M. was funded by the ALS Association of America (2284) and Fondation Thierry Latran (ALSIBD). M.C. was supported by Swiss NSF grant 31003A\_156853. We acknowledge Shota Rusataveli Georgian National Science Foundation as well as the DJEI/DES/SFI/HEA Irish Centre for High-End Computing (ICHEC) for the provision of computational facilities and Science Foundation Ireland (12/ERC/B2227) for provision of sequencing facilities. We thank Valeria Mattiangeli and Matthew D. Teasdale for their assistance.

## Author information

Author notes

1. Andrea Manica, Ron Pinhasi and Daniel G. Bradley: These authors contributed equally to this work.

### Authors and Affiliations

1. Smurfit Institute of Genetics, Trinity College Dublin, Dublin, Dublin 2, Ireland

   Eppie R. Jones, Rui Martiniano, Russell L. McLaughlin, Lara M. Cassidy, Cristina Gamba, Ron Pinhasi & Daniel G. Bradley
2. Department of Mathematics and Natural Sciences, Institute of Biochemistry and Biology, University of Potsdam, Karl-Liebknecht-Straße 24–25, Potsdam, 14476, Germany

   Gloria Gonzalez-Fortes & Michael Hofreiter
3. Department of Biology and Evolution, University of Ferrara, Via L. Borsari 46, Ferrara, I-44100, Italy

   Gloria Gonzalez-Fortes
4. School of Archaeology and Earth Institute, University College Dublin, Belfield, Dublin 4, Ireland

   Sarah Connell, Cristina Gamba & Ron Pinhasi
5. Department of Zoology, University of Cambridge, Cambridge, CB2 3EJ, UK

   Veronika Siska, Anders Eriksson, Marcos Gallego Llorente & Andrea Manica
6. Division of Biological and Environmental Sciences & Engineering, Integrative Systems Biology Laboratory, King Abdullah University of Science and Technology (KAUST), Thuwal, 23955-6900, Kingdom of Saudi Arabia

   Anders Eriksson
7. Centre for GeoGenetics, Natural History Museum of Denmark, University of Copenhagen, Øster Voldgade 5–7, Copenhagen, 1350, Denmark

   Cristina Gamba
8. Georgian National Museum, 3 Rustaveli Avenue, Tbilisi, 0105, Georgia

   Tengiz Meshveliani, Nino Jakeli & David Lordkipanidze
9. Department of Anthropology, Peabody Museum, Harvard University, Cambridge, 02138, Massachusetts, USA

   Ofer Bar-Yosef
10. Laboratoire d'archéozoologie, Université de Neuchâtel, Neuchâtel, 2000, Switzerland

    Werner Müller
11. Office du patrimoine et de l'archéologie de Neuchâtel, Section archéologie, LATÉNIUM, Hauterive, 2068, Switzerland

    Werner Müller
12. Institute of Archaeology, Hebrew University, Jerusalem, 91905, Israel

    Anna Belfer-Cohen
13. Israel Antiquities Authority, PO Box 586, Jerusalem 91004, Israel

    Zinovi Matskevich
14. Oxford Radiocarbon Accelerator Unit, Research Laboratory for Archaeology & the History of Art, University of Oxford, Oxford OX1 3QY, UK

    Thomas F. G. Higham
15. Department of Genetics and Evolution - Anthropology Unit, Laboratory of Anthropology, Genetics and Peopling History (AGP), University of Geneva, Geneva, 1227, Switzerland

    Mathias Currat

Authors

1. Eppie R. Jones

   View author publications

   You can also search for this author in
   PubMed Google Scholar
2. Gloria Gonzalez-Fortes

   View author publications

   You can also search for this author in
   PubMed Google Scholar
3. Sarah Connell

   View author publications

   You can also search for this author in
   PubMed Google Scholar
4. Veronika Siska

   View author publications

   You can also search for this author in
   PubMed Google Scholar
5. Anders Eriksson

   View author publications

   You can also search for this author in
   PubMed Google Scholar
6. Rui Martiniano

   View author publications

   You can also search for this author in
   PubMed Google Scholar
7. Russell L. McLaughlin

   View author publications

   You can also search for this author in
   PubMed Google Scholar
8. Marcos Gallego Llorente

   View author publications

   You can also search for this author in
   PubMed Google Scholar
9. Lara M. Cassidy

   View author publications

   You can also search for this author in
   PubMed Google Scholar
10. Cristina Gamba

    View author publications

    You can also search for this author in
    PubMed Google Scholar
11. Tengiz Meshveliani

    View author publications

    You can also search for this author in
    PubMed Google Scholar
12. Ofer Bar-Yosef

    View author publications

    You can also search for this author in
    PubMed Google Scholar
13. Werner Müller

    View author publications

    You can also search for this author in
    PubMed Google Scholar
14. Anna Belfer-Cohen

    View author publications

    You can also search for this author in
    PubMed Google Scholar
15. Zinovi Matskevich

    View author publications

    You can also search for this author in
    PubMed Google Scholar
16. Nino Jakeli

    View author publications

    You can also search for this author in
    PubMed Google Scholar
17. Thomas F. G. Higham

    View author publications

    You can also search for this author in
    PubMed Google Scholar
18. Mathias Currat

    View author publications

    You can also search for this author in
    PubMed Google Scholar
19. David Lordkipanidze

    View author publications

    You can also search for this author in
    PubMed Google Scholar
20. Michael Hofreiter

    View author publications

    You can also search for this author in
    PubMed Google Scholar
21. Andrea Manica

    View author publications

    You can also search for this author in
    PubMed Google Scholar
22. Ron Pinhasi

    View author publications

    You can also search for this author in
    PubMed Google Scholar
23. Daniel G. Bradley

    View author publications

    You can also search for this author in
    PubMed Google Scholar

### Contributions

D.G.B., A.M. and R.P. supervised the study. E.R.J, D.G.B. and A.M. designed the study and wrote the manuscript with contributions from all authors. E.R.J. prepared sequencing libraries and processed and analysed ancient DNA with support from S.C., R.M., R.L.M., G.G.-F., L.C. and C.G. G.G.-F. and M.H. prepared sequencing libraries for Bichon. E.R.J. performed population genetics analyses with help from D.G.B, A.M. and M.C. Coalescent modelling was performed by V.S., A.E., M.G.-L. and A.M. V.S. carried out ADMIXTURE analysis. R.P., T.M., O.B.-Y., W.M., A.B., Z.M., N.J., T.F.G.H. and D.L. provided archaeological samples and input about the archaeological samples.

### Corresponding authors

Correspondence to
Andrea Manica, Ron Pinhasi or Daniel G. Bradley.

## Ethics declarations

### Competing interests

The authors declare no competing financial interests.

## Supplementary information

### Supplementary Information

Supplementary Figures 1-10, Supplementary Tables 1-23, Supplementary Notes 1-9 and Supplementary References (PDF 2785 kb)

## Rights and permissions

This work is licensed under a Creative Commons Attribution 4.0 International License. The images or other third party material in this article are included in the article’s Creative Commons license, unless indicated otherwise in the credit line; if the material is not included under the Creative Commons license, users will need to obtain permission from the license holder to reproduce the material. To view a copy of this license, visit http://creativecommons.org/licenses/by/4.0/

Reprints and permissions

## About this article

### Cite this article

Jones, E., Gonzalez-Fortes, G., Connell, S. *et al.* Upper Palaeolithic genomes reveal deep roots of modern Eurasians.
*Nat Commun* **6**, 8912 (2015). https://doi.org/10.1038/ncomms9912

Download citation

- Received: 20 July 2015
- Accepted: 15 October 2015
- Published: 16 November 2015
- DOI: https://doi.org/10.1038/ncomms9912

### Share this article

Anyone you share the following link with will be able to read this content:

Get shareable link

Sorry, a shareable link is not currently available for this article.

Copy to clipboard

Provided by the Springer Nature SharedIt content-sharing initiative

## This article is cited by

- ### The Allen Ancient DNA Resource (AADR) a curated compendium of ancient human genomes

  - Swapan Mallick
  - Adam Micco
  - David Reich

  *Scientific Data* (2024)
- ### Genome-wide analysis of a collective grave from Mentesh Tepe provides insight into the population structure of early neolithic population in the South Caucasus

  - Perle Guarino-Vignon
  - Maël Lefeuvre
  - Céline Bon

  *Communications Biology* (2023)
- ### Socio-cultural practices may have affected sex differences in stature in Early Neolithic Europe

  - Samantha L. Cox
  - Nicole Nicklisch
  - Iain Mathieson

  *Nature Human Behaviour* (2023)
- ### Genome sequences of 36,000- to 37,000-year-old modern humans at Buran-Kaya III in Crimea

  - E. Andrew Bennett
  - Oğuzhan Parasayan
  - Eva-Maria Geigl

  *Nature Ecology & Evolution* (2023)
- ### Genetic continuity, isolation, and gene flow in Stone Age Central and Eastern Europe

  - Tiina M. Mattila
  - Emma M. Svensson
  - Mattias Jakobsson

  *Communications Biology* (2023)

## Comments

By submitting a comment you agree to abide by our Terms and Community Guidelines. If you find something abusive or that does not comply with our terms or guidelines please flag it as inappropriate.


Download PDF

Advertisement

## Explore content

- Research articles
- Reviews & Analysis
- News & Comment
- Videos
- Collections
- Subjects

- Follow us on Facebook
- Follow us on Twitter
- Sign up for alerts
- RSS feed


## About the journal

- Aims & Scope
- Editors
- Journal Information
- Open Access Fees and Funding
- Calls for Papers
- Editorial Values Statement
- Journal Metrics
- Editors' Highlights
- Contact
- Editorial policies
- Top Articles


## Publish with us

- For authors
- For Reviewers
- Language editing services
- Submit manuscript

## Search

Search articles by subject, keyword or author

Show results from

All journals
This journal

Search

Advanced search

### Quick links

- Explore articles by subject
- Find a job
- Guide to authors
- Editorial policies

Nature Communications (*Nat Commun*)

ISSN 2041-1723 (online)

## nature.com sitemap

### About Nature Portfolio

- About us
- Press releases
- Press office
- Contact us

### Discover content

- Journals A-Z
- Articles by subject
- protocols.io
- Nature Index

### Publishing policies

- Nature portfolio policies
- Open access

### Author & Researcher services

- Reprints & permissions
- Research data
- Language editing
- Scientific editing
- Nature Masterclasses
- Research Solutions

### Libraries & institutions

- Librarian service & tools
- Librarian portal
- Open research
- Recommend to library

### Advertising & partnerships

- Advertising
- Partnerships & Services
- Media kits
- Branded
  content

### Professional development

- Nature Careers
- Nature 
  Conferences

### Regional websites

- Nature Africa
- Nature China
- Nature India
- Nature Italy
- Nature Japan
- Nature Middle East

- Privacy
  Policy
- Use
  of cookies
- Your privacy choices/Manage cookies
- Legal
  notice
- Accessibility
  statement
- Terms & Conditions
- Your US state privacy rights

© 2024 Springer Nature Limited

xml version="1.0" encoding="UTF-8"?

Close banner

Close

Sign up for the *Nature Briefing* newsletter — what matters in science, free to your inbox daily.

Email address

Sign up

I agree my information will be processed in accordance with the *Nature* and Springer Nature Limited Privacy Policy.

Close banner

Close

Get the most important science stories of the day, free in your inbox.
Sign up for Nature Briefing
